# Supplementary material
Source: publisher figshare collection journal article supplement (https://sage.figshare.com/ndownloader/files/19037324)
Supplement: Supplementary file 1 [file 19037324]

**Supplementary Material:**

1. Stratigraphic sections with field photographs and detailed description of layers based on macro-and-microscopic observations

2. Volume calculation for Las Derrumbadas domes
